# Supplementary material for: Controlling active turbulence by activity patterns
Source: Royal Society of Chemistry journal article supplement (doi:10.1039/d3sm01050c), 2024-01-01
Supplement: d3sm01050c1.pdf [file d3sm01050c1.pdf]

## Supplementary information

Video 1 demonstrates the temporal evolution of the director and scalar order parameter fields for active turbulence with  $W = -3.25$ , where a snapshot of it is depicted in Fig. 2a.  $+1/2$  and  $-1/2$  defects are indicated by red and cyan dots respectively.

Video 2 demonstrates the temporal evolution of the velocity and vorticity fields for active turbulence with  $W = -3.25$ , where a snapshot of it is depicted in Fig. 2b.

Video 3 demonstrates time evolution of the velocity and vorticity fields in the transient state for parameters  $\Lambda = 0.6$  and  $\delta = 0.12$ , where two snapshots of it are depicted in Fig. 12.

Video 4 demonstrates time evolution of the velocity and vorticity fields in the isotropic turbulence state for parameters  $\Lambda = 0.6$  and  $\delta = 0.16$ .

Video 5 demonstrates time evolution of the velocity and vorticity fields in the multi-lane state for parameters  $\Lambda = 0.6$  and  $\delta = 0.04$ , where a snapshot of it is depicted in Fig. 7a.

Video 6 shows dynamic of director and scalar order parameter fields for trapped vortex state for parameters  $\Lambda = 1.0$  and  $\delta = 0.04$ , where one snapshot of it is depicted in Fig. 13b.
